# Supplementary material for: Structures of the EphA2 Receptor at the Membrane: Role of Lipid Interactions
Source: PubMed Central journal article supplement (PMC4744086; doi:10.1016/j.str.2015.11.008), 2016-02-02
Supplement: mmc1.pdf [file mmc1.pdf]

**Structure, Volume 24**

**Supplemental Information**

**Structures of the EphA2 Receptor  
at the Membrane: Role of Lipid Interactions**

**Matthieu Chavent, Elena Seiradake, E. Yvonne Jones, and Mark S.P. Sansom**

# Supplemental Information

## Supplementary text related to Method and Figures 2, 6, S3, S4 and S6

In order to quantify the protein-lipids interactions occurring during the simulations, we first define an interaction count function,  $C_l(res_i)$  of the interactions between residue  $i$  and the lipid type  $l$  for a time  $t$ :

$$C_l(res_i) = \begin{cases} \text{Nb. atoms from lipid type } l \text{ within } 8 \text{ \AA} \text{ of } res_i \\ 0 \text{ otherwise} \end{cases}$$

The proportional interaction of a residue  $i$  for a lipid type  $l$ ,  $I_{i,l}$ , is then obtained summation of the interaction counts over the time the protein forms a stable interaction with the membrane and normalising it by the duration of the interaction:

$$I_{i,l} = \frac{1}{N - n_b} \sum_{n_b}^N C_l(res_i)$$

where  $N$  is the total simulation time and  $n_b$  the time at which the interaction occurs.

This allows one to define a proportional interaction for PC and PG lipids (respectively  $I_{i,POPC}$  and  $I_{i,POPG}$ ) for a residue  $i$ .

We then normalized over the different residues using the maximum of PC+PG value to obtain a value between 0 and 1:

$$Max_{I(PC,PG)} = \max(I_{i,POPC} + I_{i,POPG})$$

with  $i$  varying from first residue number to the last.

$$N(I_i) = \frac{I_{i,POPC}}{Max_{I(PC,PG)}} + \frac{I_{i,POPG}}{Max_{I(PC,PG)}}$$

We used  $N(I_i)$  values to create the histograms presented in Figures 2, 6, S3, S4 and S6.

The curve, highlighting the preference for PG lipid was obtained using the expression:

$$P_{i,POPG} = \frac{I_{i,POPG}}{Max_{I(PC,PG)}} - \frac{I_{i,POPC}}{Max_{I(PC,PG)}}$$

**Table S1 related to Table 1: Summary of the FN2 simulations interacting with the membrane.** Simulation duration and time to binding for the diffusion protocol (Wild Type – WT – and mutant). The ‘time to binding’ refers to the time elapsed between the start of the simulation and the onset of a stable interaction with the membrane. Each simulation was run for at least 500 ns of simulation following formation of this initial interaction. If the protein did not interact with the the membrane after 6  $\mu$ s it was considered not to bind.

| System name                                                       | duration (ns) | binding | time to binding (ns) |
|-------------------------------------------------------------------|---------------|---------|----------------------|
| <b>100% PC (WT)</b>                                               |               |         |                      |
| FN2 180°                                                          | 6000          | No      | ###                  |
| FN2 0°                                                            | 6000          | No      | ###                  |
| FN2 90° A                                                         | 6000          | No      | ###                  |
| FN2 90° B                                                         | 6000          | yes     | 1430                 |
| <b>60% PC - 40% PG (FN2 WT)</b>                                   |               |         |                      |
| FN2 180°                                                          | 2000          | yes     | 1525                 |
| FN2 0°                                                            | 2000          | yes     | 1500                 |
| FN2 90° A                                                         | 1000          | yes     | 147                  |
| FN2 90° B                                                         | 1000          | yes     | 107                  |
| <b>60% PC - 40% PG (FN2 K441E+K443E mutant)</b>                   |               |         |                      |
| FN2 180°                                                          | 1000          | Yes     | 324                  |
| FN2 0°                                                            | 3000          | Yes     | 1934                 |
| FN2 90° A                                                         | 2000          | Yes     | 1400                 |
| FN2 90° B                                                         | 3000          | Yes     | 2150                 |
| <b>60% PC - 40% PG (FN2 K441E+K443E+R465E mutant)</b>             |               |         |                      |
| FN2 180°                                                          | 6000          | No      | ###                  |
| FN2 0°                                                            | 1000          | Yes     | 343                  |
| FN2 90° A                                                         | 5000          | Yes     | 4198                 |
| FN2 90° B                                                         | 2000          | Yes     | 990                  |
| <b>60% PC - 40% PG (FN2 K441E+K443E+R465E+F490A mutant)</b>       |               |         |                      |
| FN2 180°                                                          | 2000          | Yes     | 1672                 |
| FN2 0°                                                            | 4000          | Yes     | 3121                 |
| FN2 90° A                                                         | 6000          | No      | ###                  |
| FN2 90° B                                                         | 2000          | No      | ###                  |
| <b>60% PC - 40% PG (FN2 K441E+K443E+R465E+F490A+W467A mutant)</b> |               |         |                      |
| FN2 180°                                                          | 2000          | Yes     | 1498                 |
| FN2 0°                                                            | 7000          | Yes     | 5759                 |
| FN2 90° A                                                         | 7000          | Yes     | 5995                 |
| FN2 90° B                                                         | 2000          | Yes     | 1095                 |

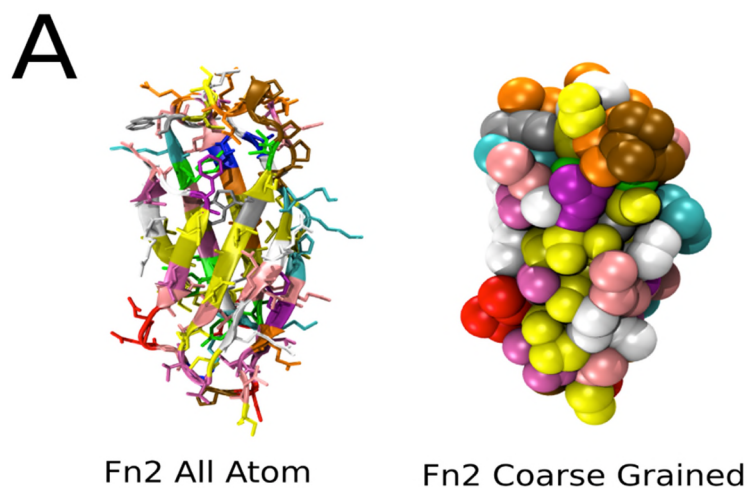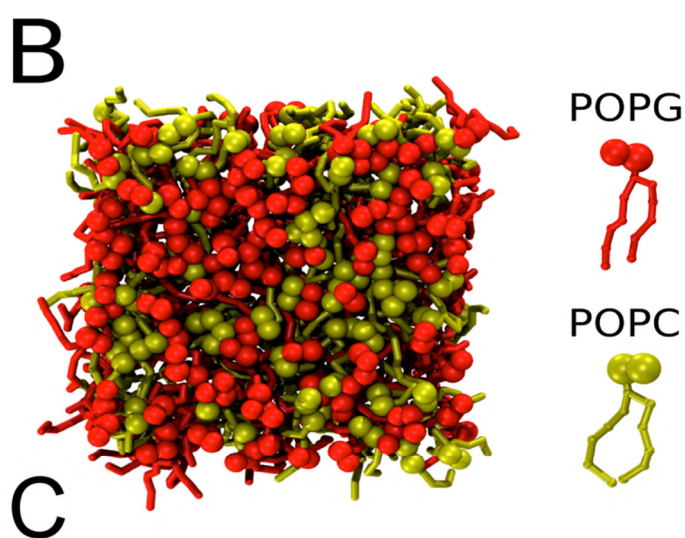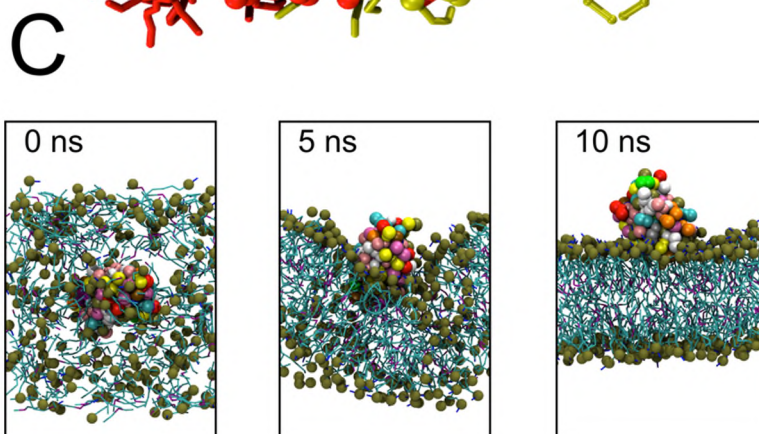

**Figure S1 (related to Figure 1 and Methods):** (A) Atomistic (left) and coarse-grained (right) models of the FN2 domain. (B) Mixed (PG+PC) membrane model for CG simulations. (C) Progress of the bilayer self-assembly simulation at different time steps.

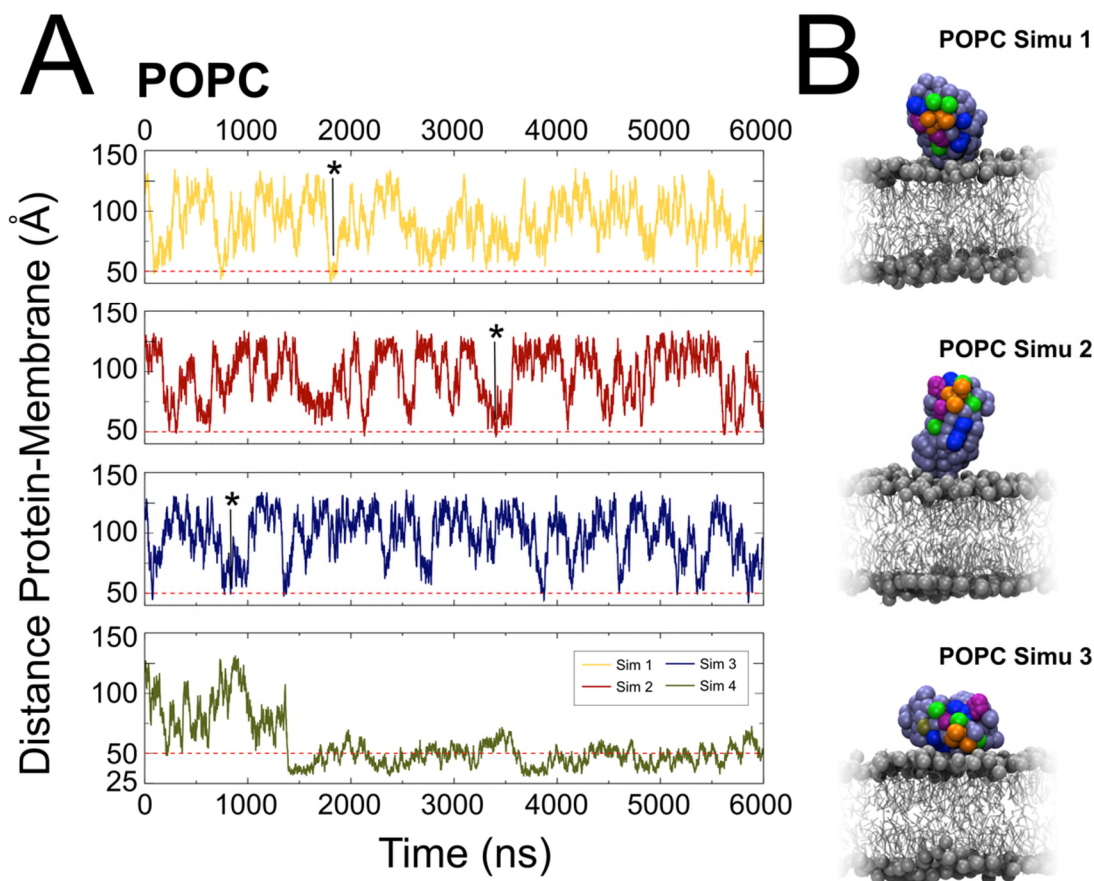

**Figure S2 (related to Figure 1):** distance between the FN2 domain and the membrane during CG simulations. (A) Evolution of the distance between the centres of mass of the membrane and of the FN2 domain in function of the time for CG simulations performed with the PC bilayer. (B) Different transient interactions of the FN2 domain with the PC membrane (highlighted by a star in A). Residues coloured in green, violet dark blue and orange are the main interacting residues depicted Fig. 2 A and S2. In (A) the dashed line depicts the distance from which the protein can touch the membrane, and in (B) Simu 1, Simu 2 and Simu 3 correspond to snapshots from the respective repeat simulations

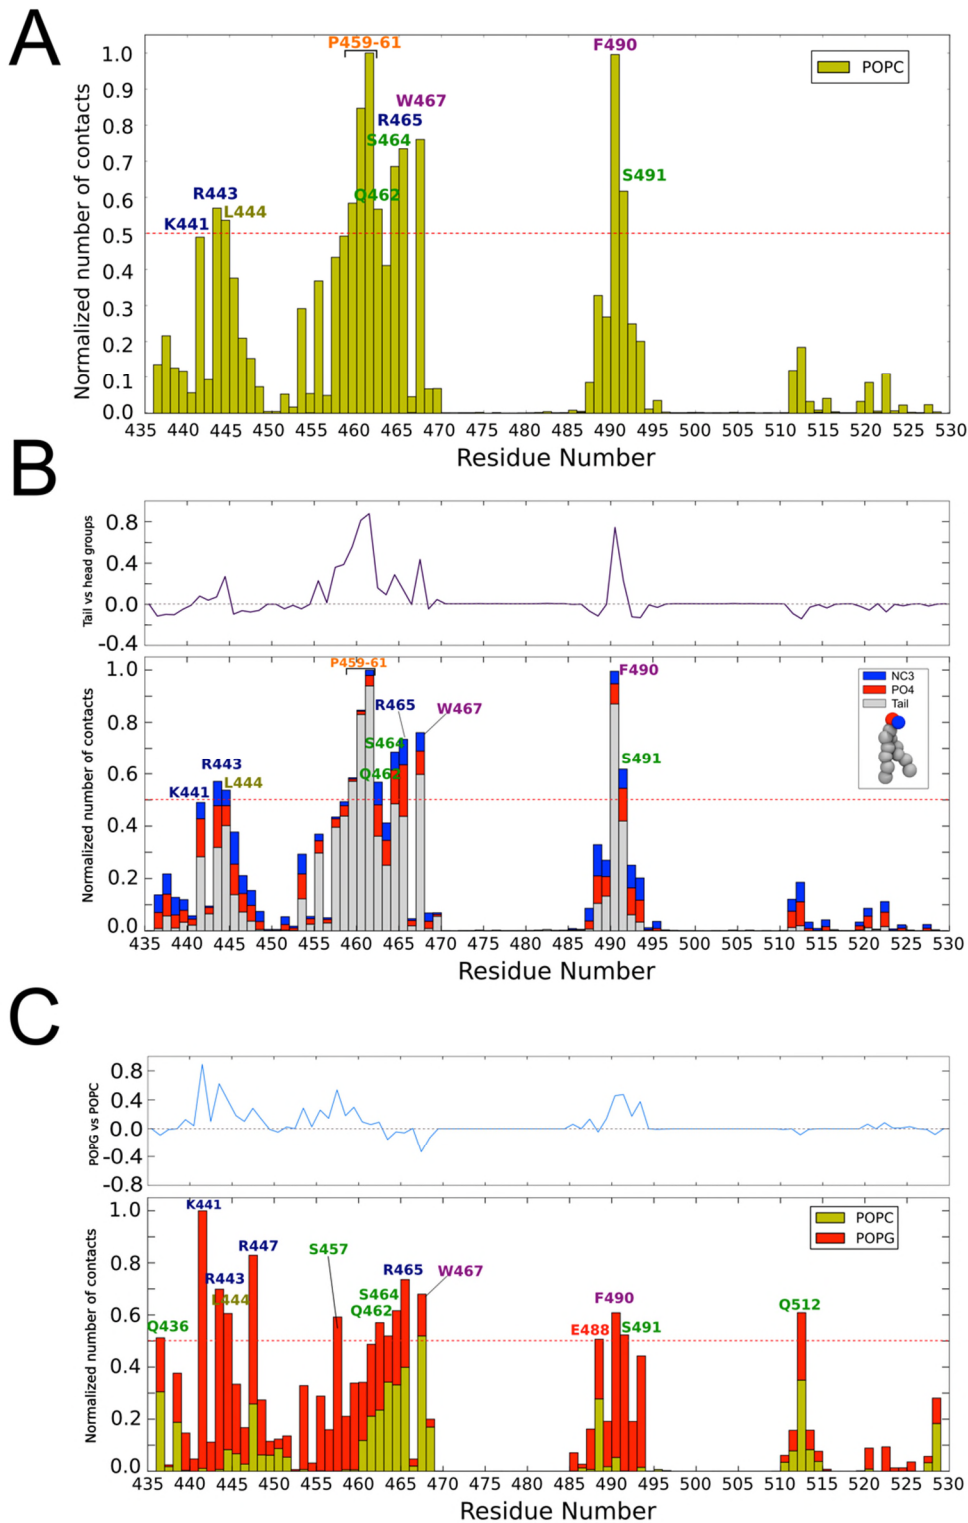

**Figure S3 (related to Figure 1):** Normalized averaged number of contacts. (A) Normalized average number of contacts of PC lipids as a function of residue number for the Wild Type. (B) Decomposition of the normalized average number of contacts for PC between NC3, PO4 particles and lipid tail. Dark curve displays the difference between the number of contact for the head group particles (NC3 and PO4) and the tail: positive values depict the preference of the residue for the tail. (C) Normalized average number of contacts of PC-PG membrane with the FN2 WT as a function of residue number for the AT simulations. The blue curve displays the difference between the number of contact for the PG lipids and PC lipids: positive values depict the preference of the residue for the PG lipids.

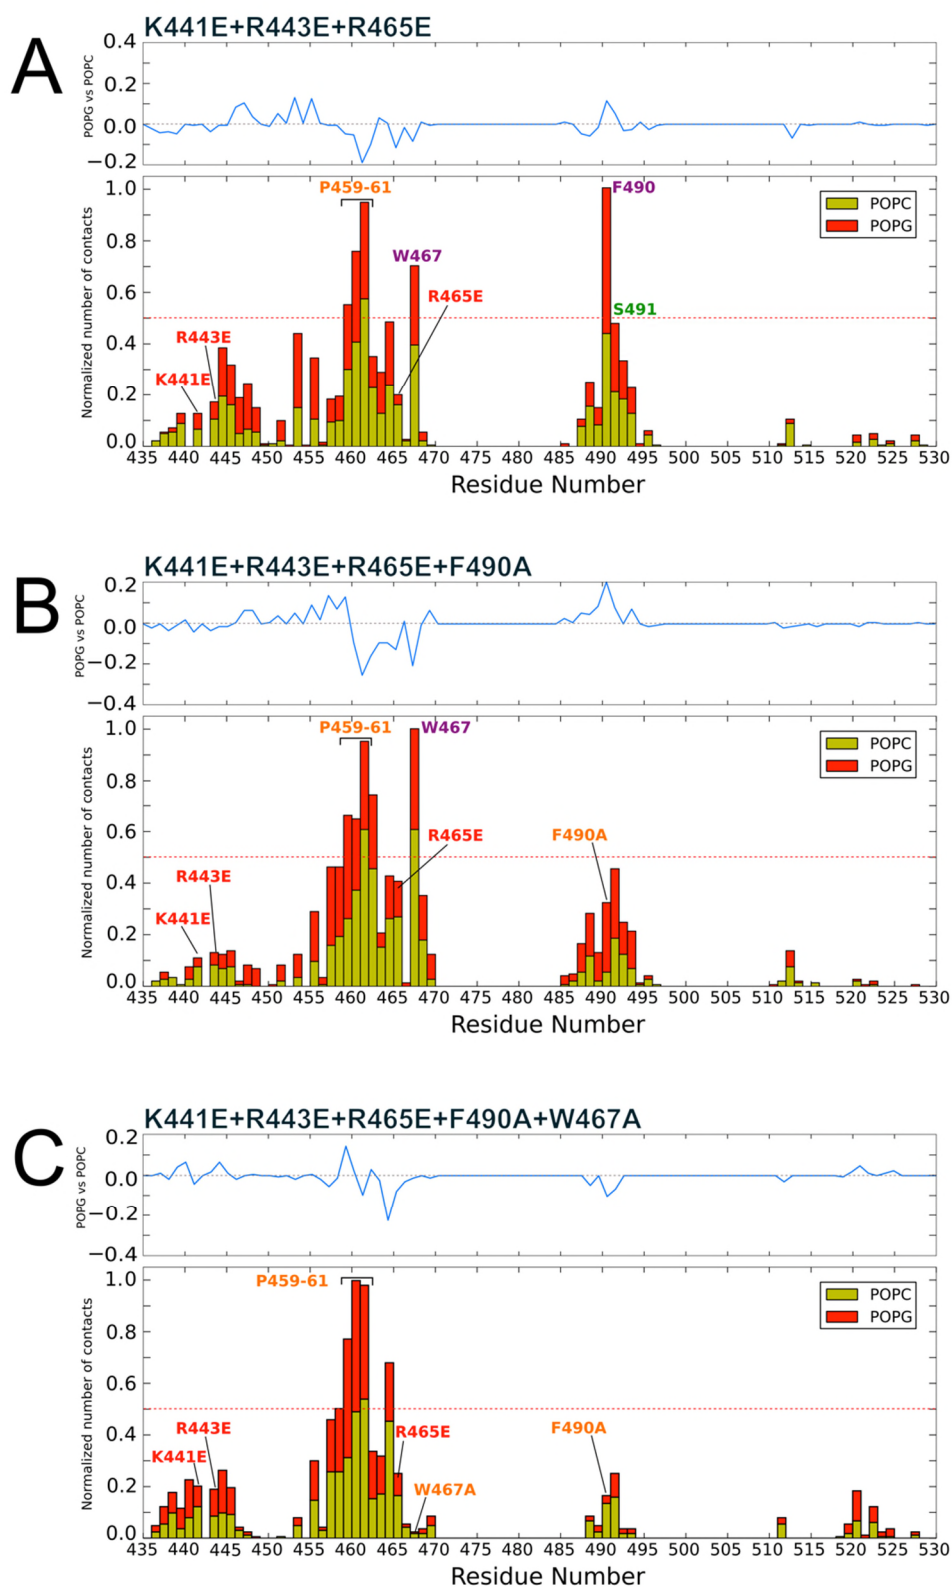

**Figure S4 (related to Figure 2):** Normalized averaged number of contacts for different mutants. Normalized average number of contacts of a PC-PG membrane with the (A) FN2 K441+R443+R365, (B) K441+R443+R365+F490A, and (C) K441+R443+R365 +F490A+W467A mutants as a function of residue number for the CG simulations. The blue curve displays the difference between the number of contact for the PG lipids and PC lipids: positive values depict the preference of the residue for the PG lipids.



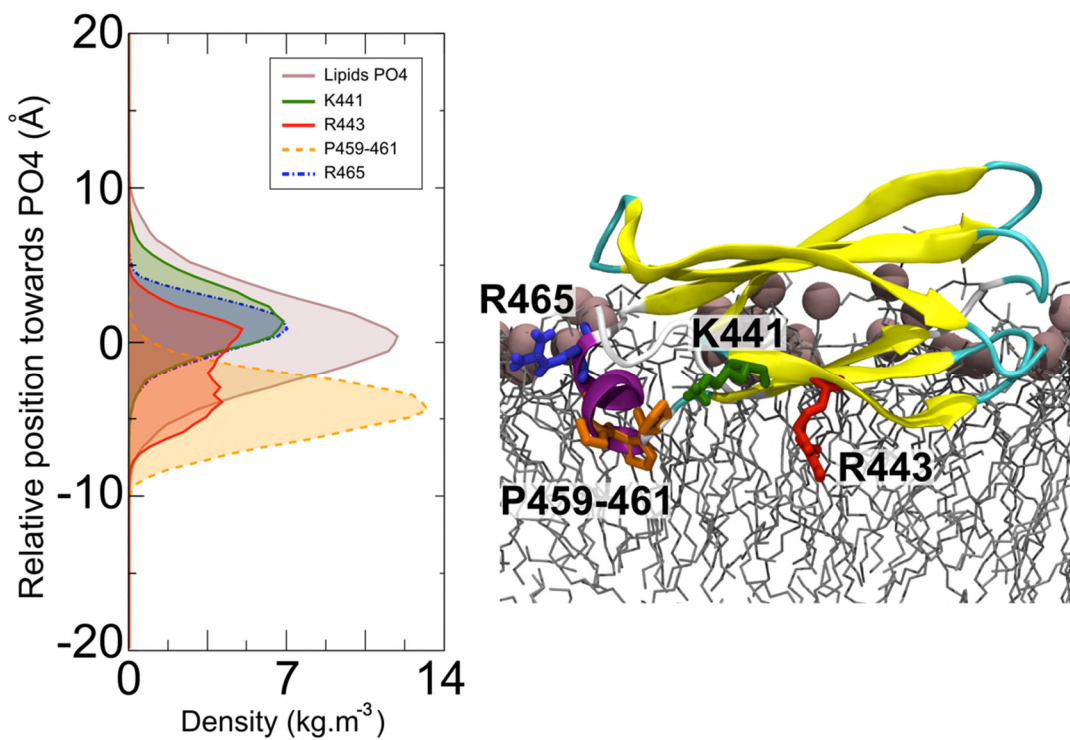

**Figure S5 (related to Figure 4):** FN2 positioning at the membrane. On left, the graph depicts the density profiles along the bilayer normal of several important residues for the interaction with the membrane. The profile is centred on the PO4 headgroup density. The amplitude of PO4 curve was divided by ten to fit in the graph. On right, a snapshot taken at the end of the AT simulation illustrates the graph results.



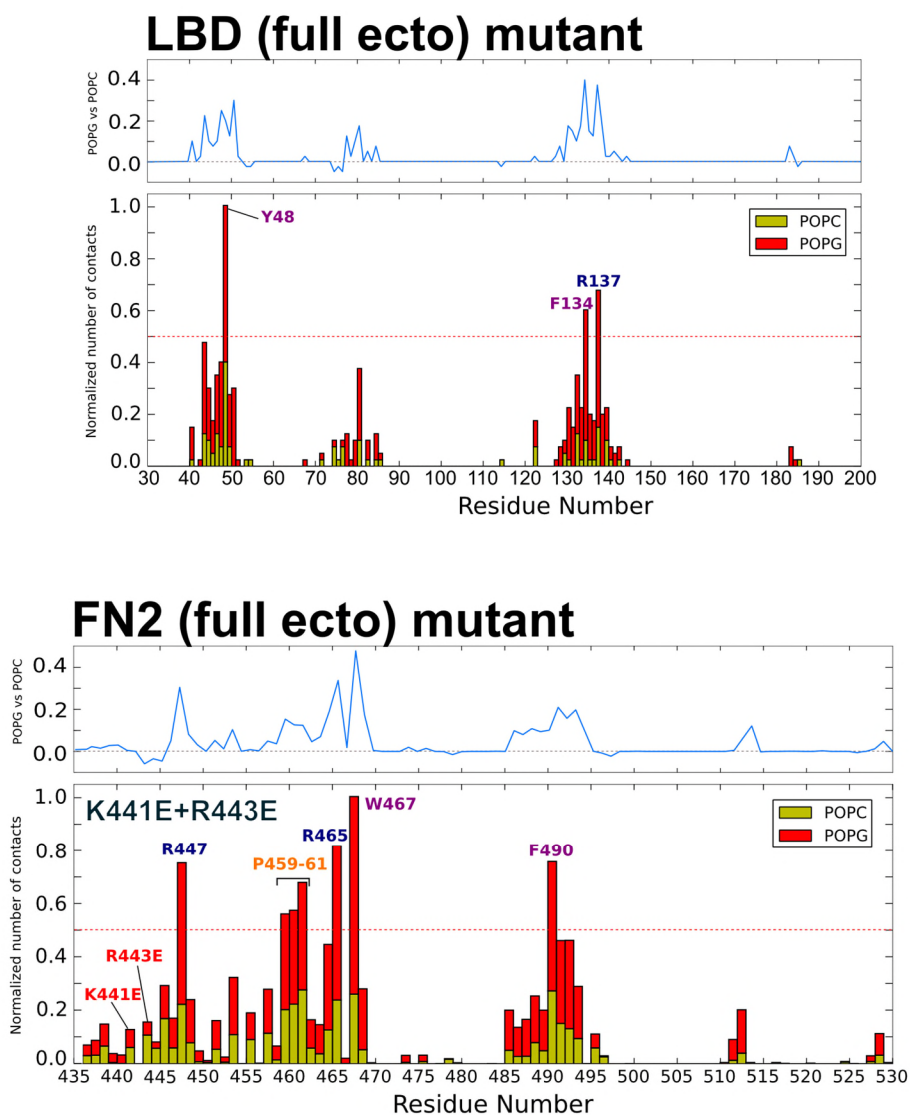

**Figure S6 (related to Figure 6):** Normalized averaged number of contacts of the LBD (upper panel) and FN2 domains (lower panel) with a PC-PG membrane for the K441E+R443E full ectodomain mutant. The blue curve displays the difference between the number of contact for the PG lipids and PC lipids: positive values depict the preference of the residue for the PG lipids.

### **3D Molecular Model (related to Figure 4):**

A model of the FN2 domain at the membrane surface linked to the TM domain. Note that to obtain the numbering presented in the paper one has to add 435 to the residue number. This model is presented in Figure 4A of the paper.
